# Supplementary material for: The coexistence of threshold and memory switching characteristics of ALD HfO2 memristor synaptic arrays for energy-efficient neuromorphic computing
Source: Royal Society of Chemistry journal article supplement (doi:10.1039/d0nr02335c), 2020-01-01
Supplement: d0nr02335c1.pdf [file d0nr02335c1.pdf]

## Supporting Information

### **The Coexistence of Threshold and Memory Switching Characteristics of ALD HfO<sub>2</sub> Memristor Synaptic Arrays for Energy-Efficient Neuromorphic Computing**

Haider Abbas,<sup>a</sup> Yawar Abbas,<sup>b</sup> Gul Hassan,<sup>c</sup> Andrey Sergeevich Sokolov,<sup>a</sup> Yu-Rim Jeon,<sup>a</sup>

Boncheol Ku,<sup>a</sup> Chi Jung Kang,<sup>d</sup> and Changhwan Choi <sup>\*a</sup>

*<sup>a</sup>Division of Materials Science and Engineering, Hanyang University, Seoul 04763, Republic of Korea.*

*<sup>b</sup>Department of Physics, Khalifa University, Abu Dhabi 127788, United Arab Emirates*

*<sup>c</sup>Centre for Advanced Electronics & Photovoltaic Engineering, International Islamic University, Islamabad 44000, Pakistan*

*<sup>d</sup>Department of Physics, Myongji University, Gyeonggi-do 17058, Republic of Korea*

*\*Corresponding author's e-mail: [cchoi@hanyang.ac.kr](mailto:cchoi@hanyang.ac.kr)*

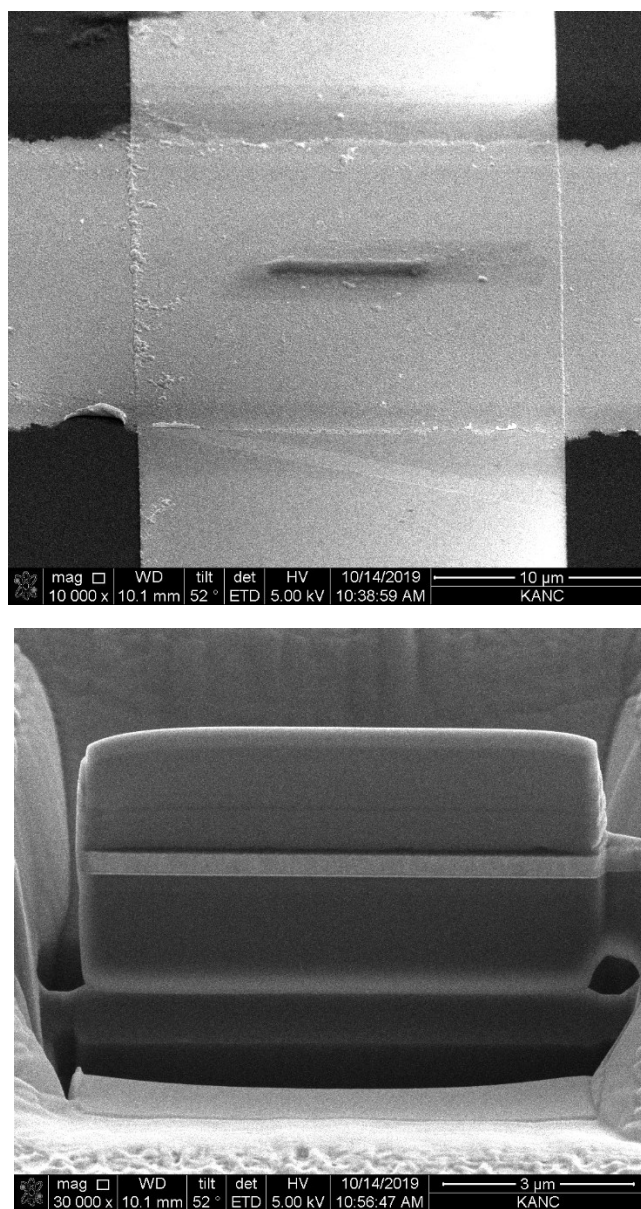

**Figure S1.** The SEM images of the crosspoint used for TEM analyses. The TEM sample was prepared via FIB at the center of a crosspoint.

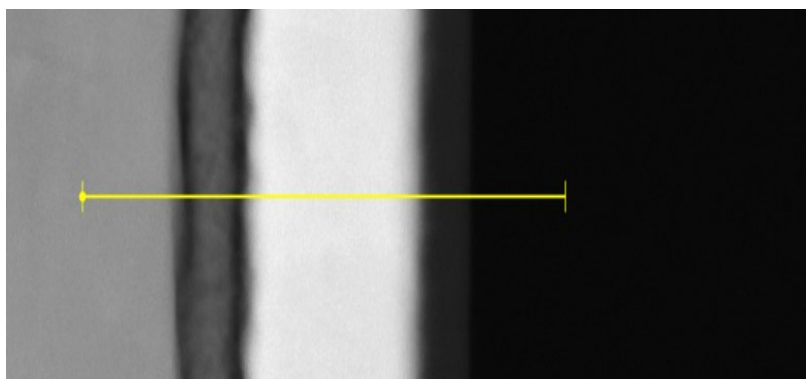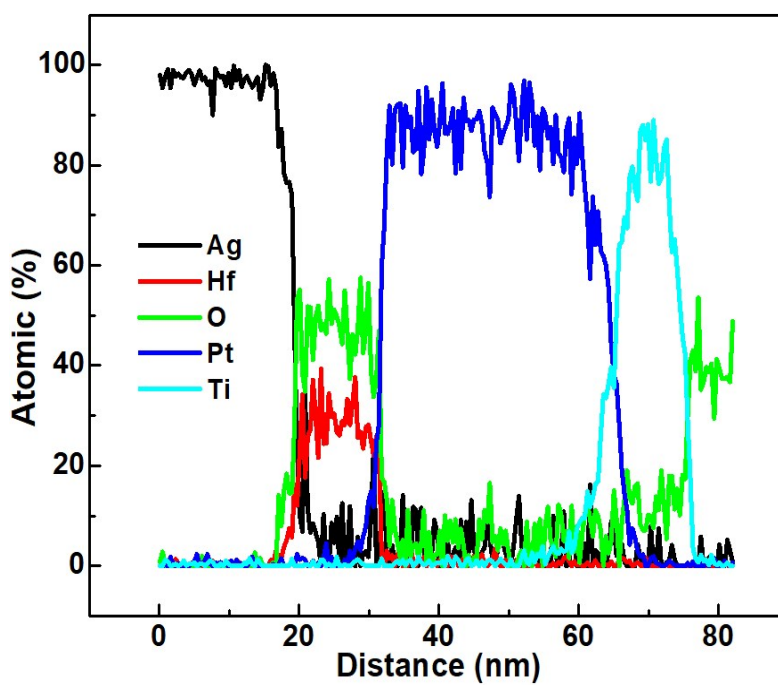

**Figure S2.** The elemental line EDS of the device carried out across the device at the indicated yellow line.

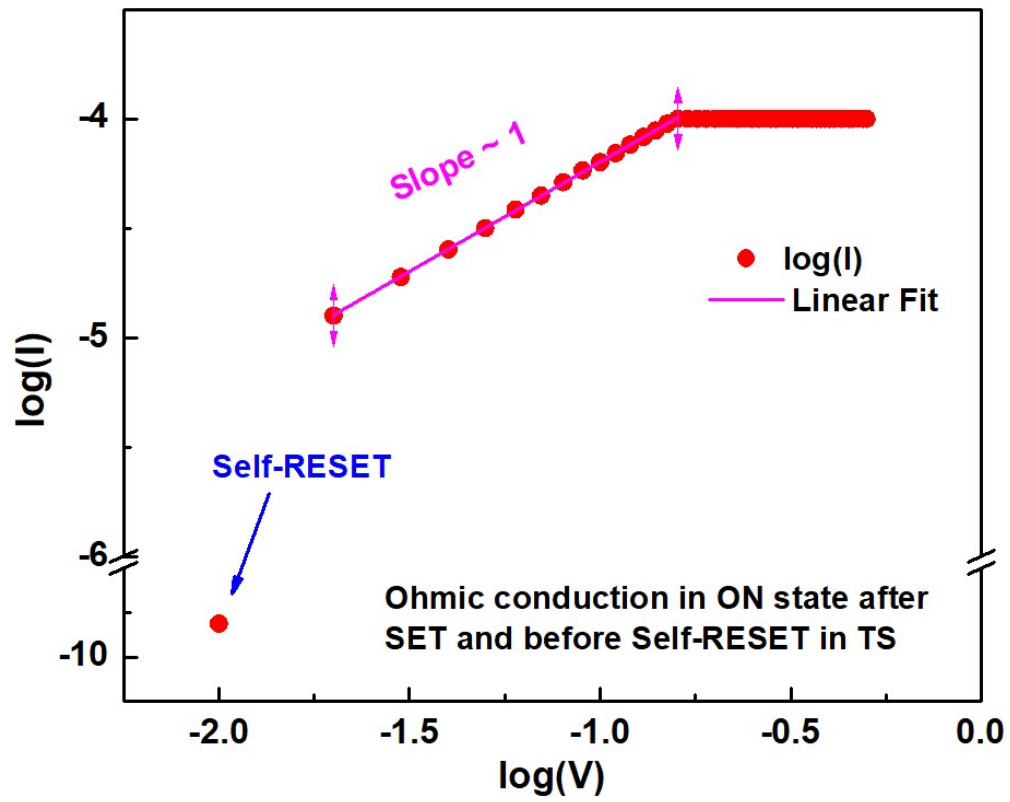

**Figure S3.** The  $\log I$ - $\log V$  plot of the ON state in threshold switching.

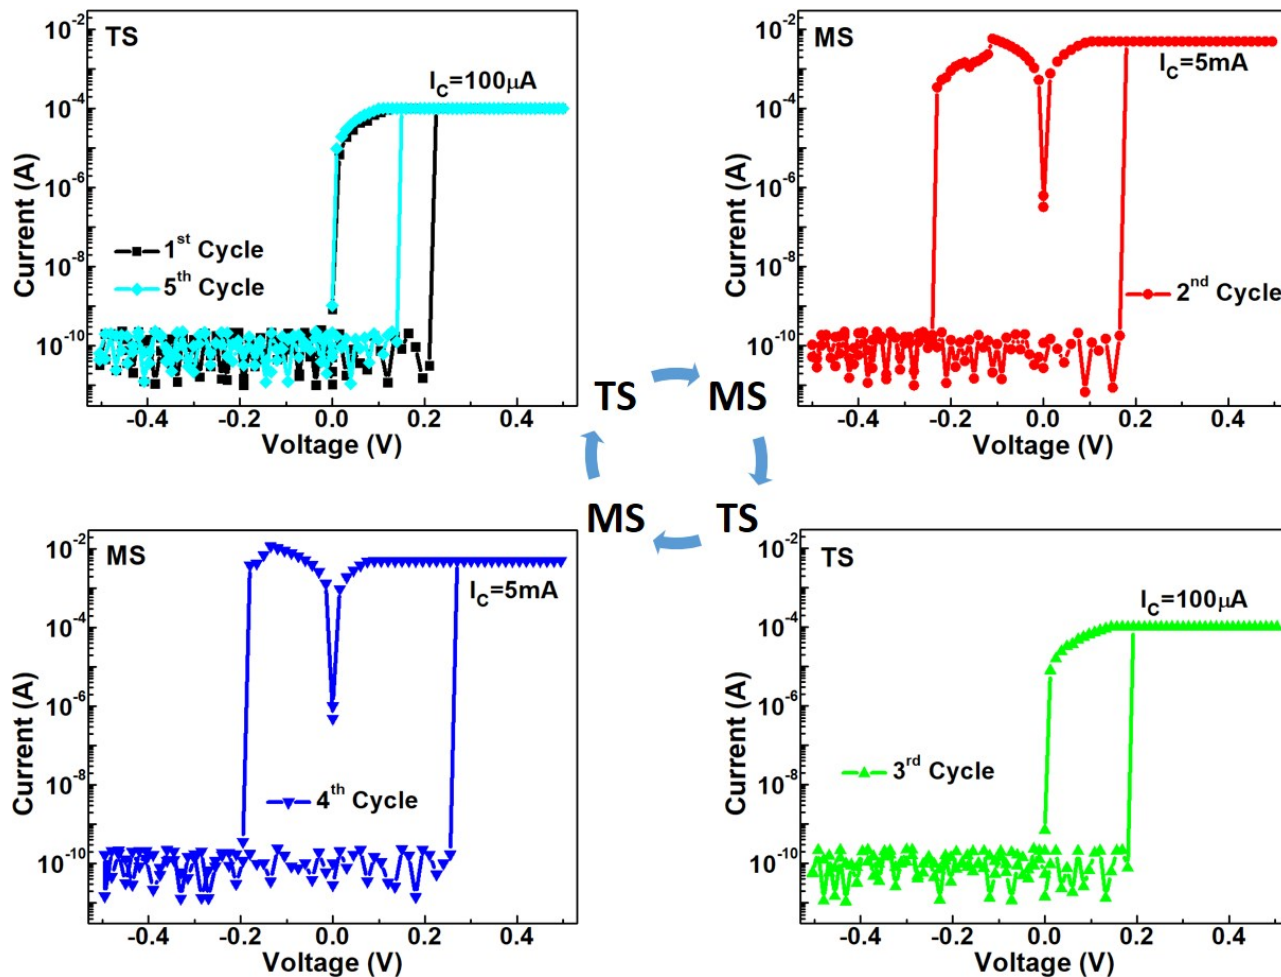

**Figure S4.** The Typical I-V characteristics of the device exhibiting the reversible transition and the coexistence of volatile TS and non-volatile MS behaviors. The device presented TS behaviors when operated with low  $I_C$  ( $100 \mu\text{A}$ ), whereas, MS switching characteristics were observed at higher  $I_C$  ( $5 \text{ mA}$ ).

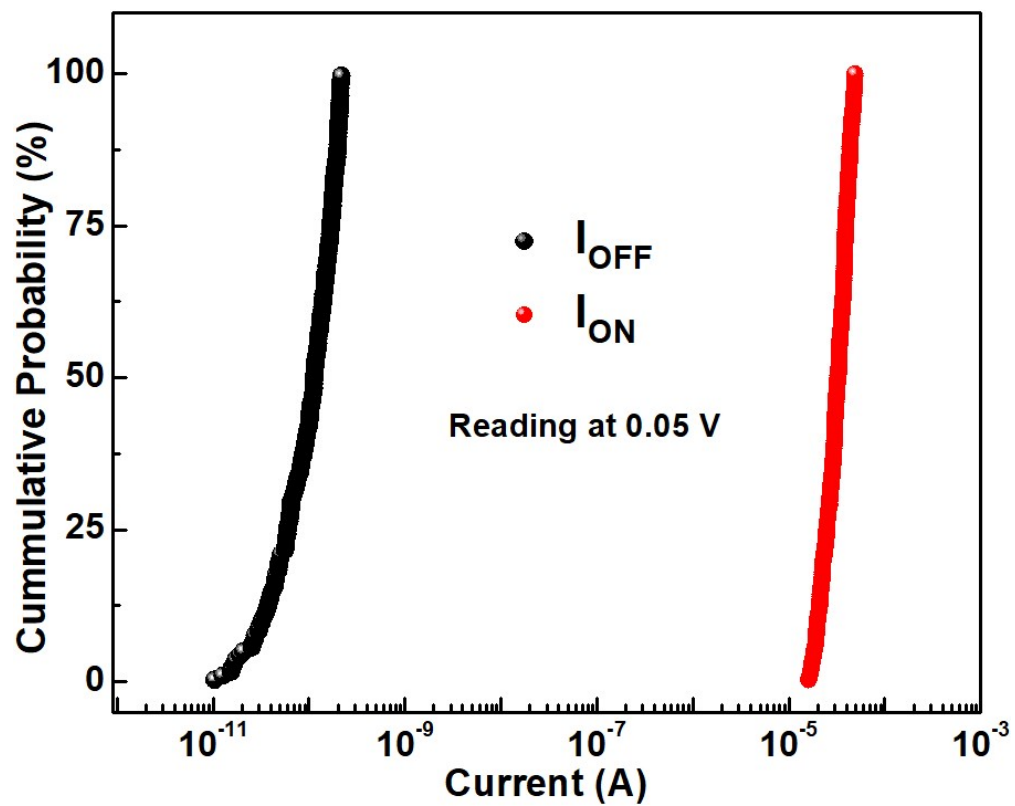

**Figure S5.** The cumulative probability plot of the OFF and ON currents for 300 repeated cycles in threshold switching.

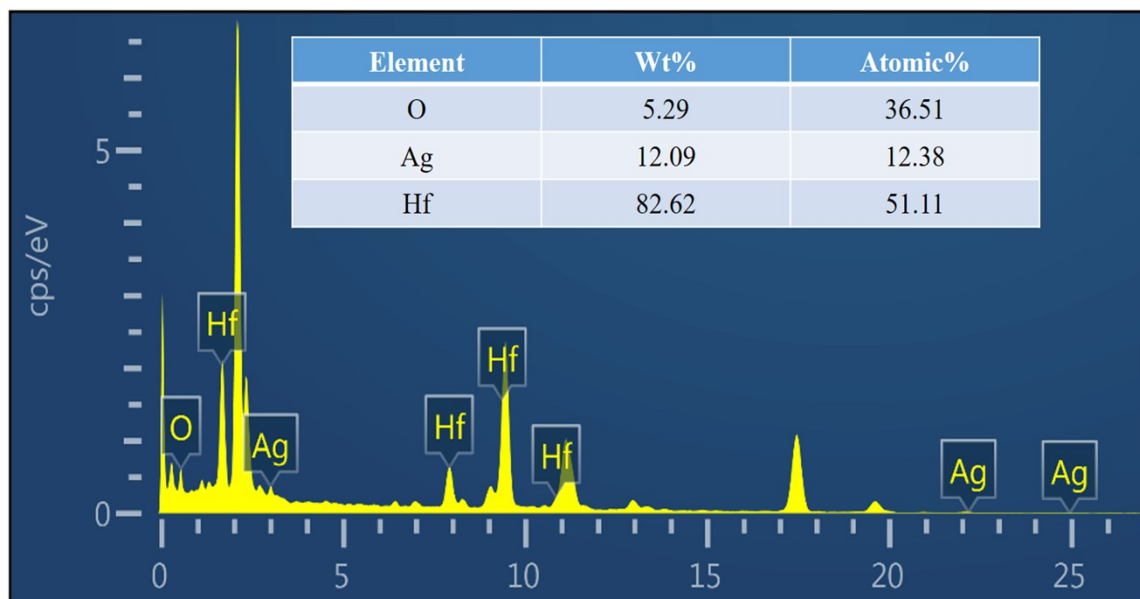

**Figure S6.** The EDS analysis carried out in the center of the CF region. The EDs confirms the presence of Ag in the CF.

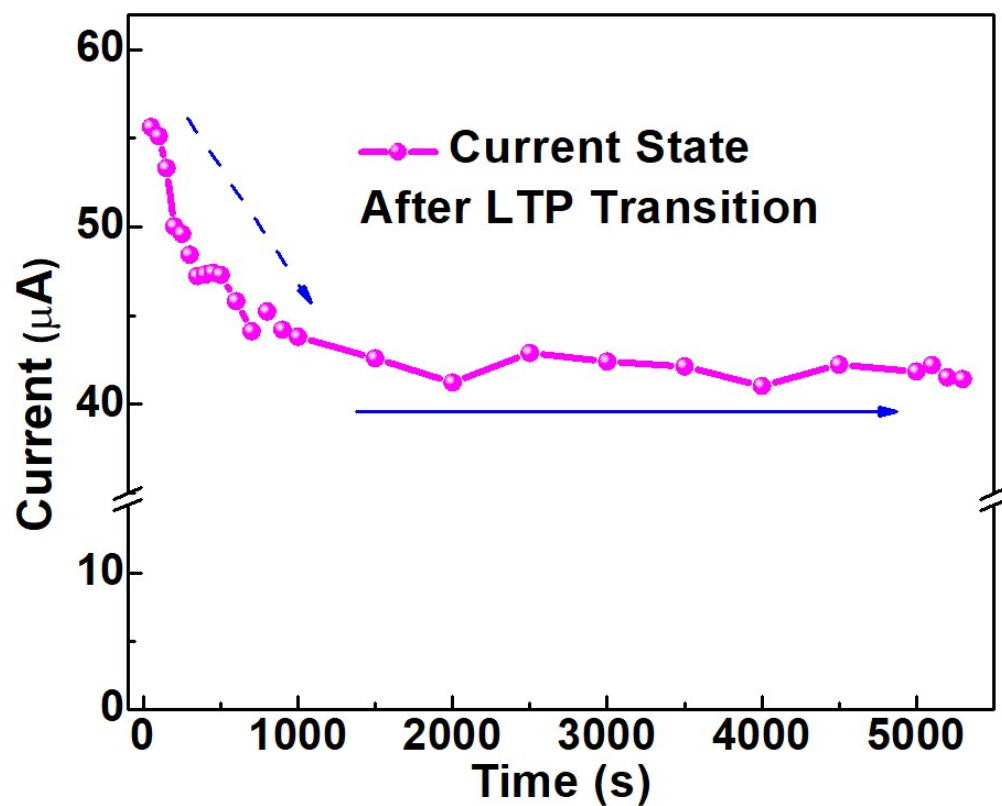

**Figure S7.** The longer time retention after application of 30 pulses (LTP transition). Negligible degradation in ON state is observed after the LTP transition.



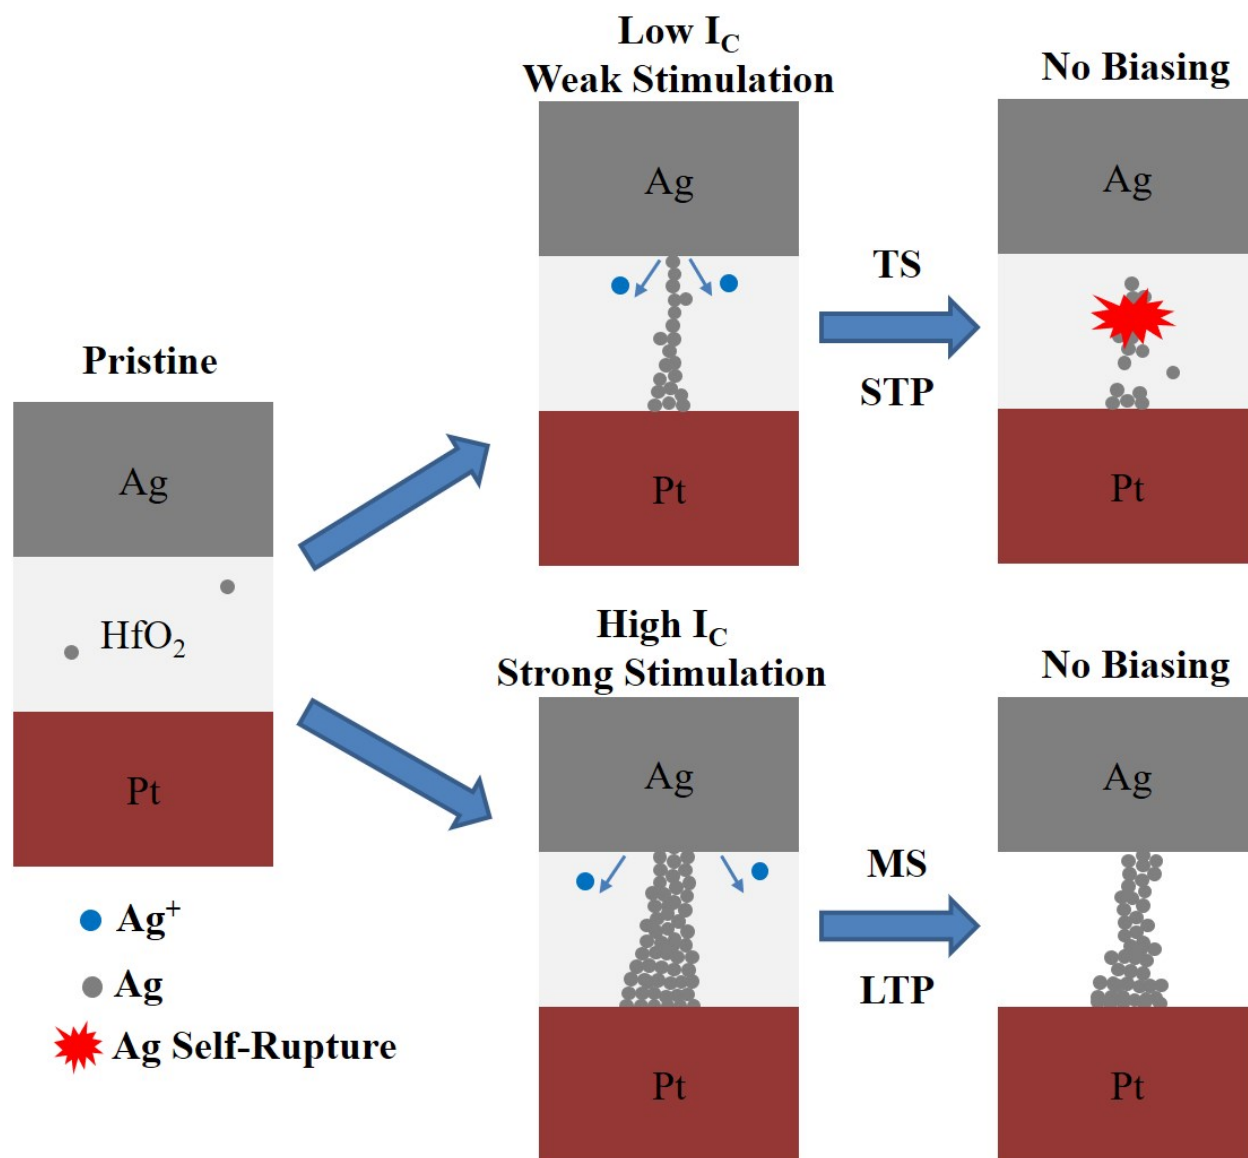

**Figure S8.** The schematic illustration of the switching mechanism. The device operated with low  $I_c$  or weak pulses results in the formation of a weak CF providing volatile TS or STP behavior whereas, high  $I_c$  operation or strong pulse stimulations form a thick CF providing nonvolatile MS or LTP behavior.

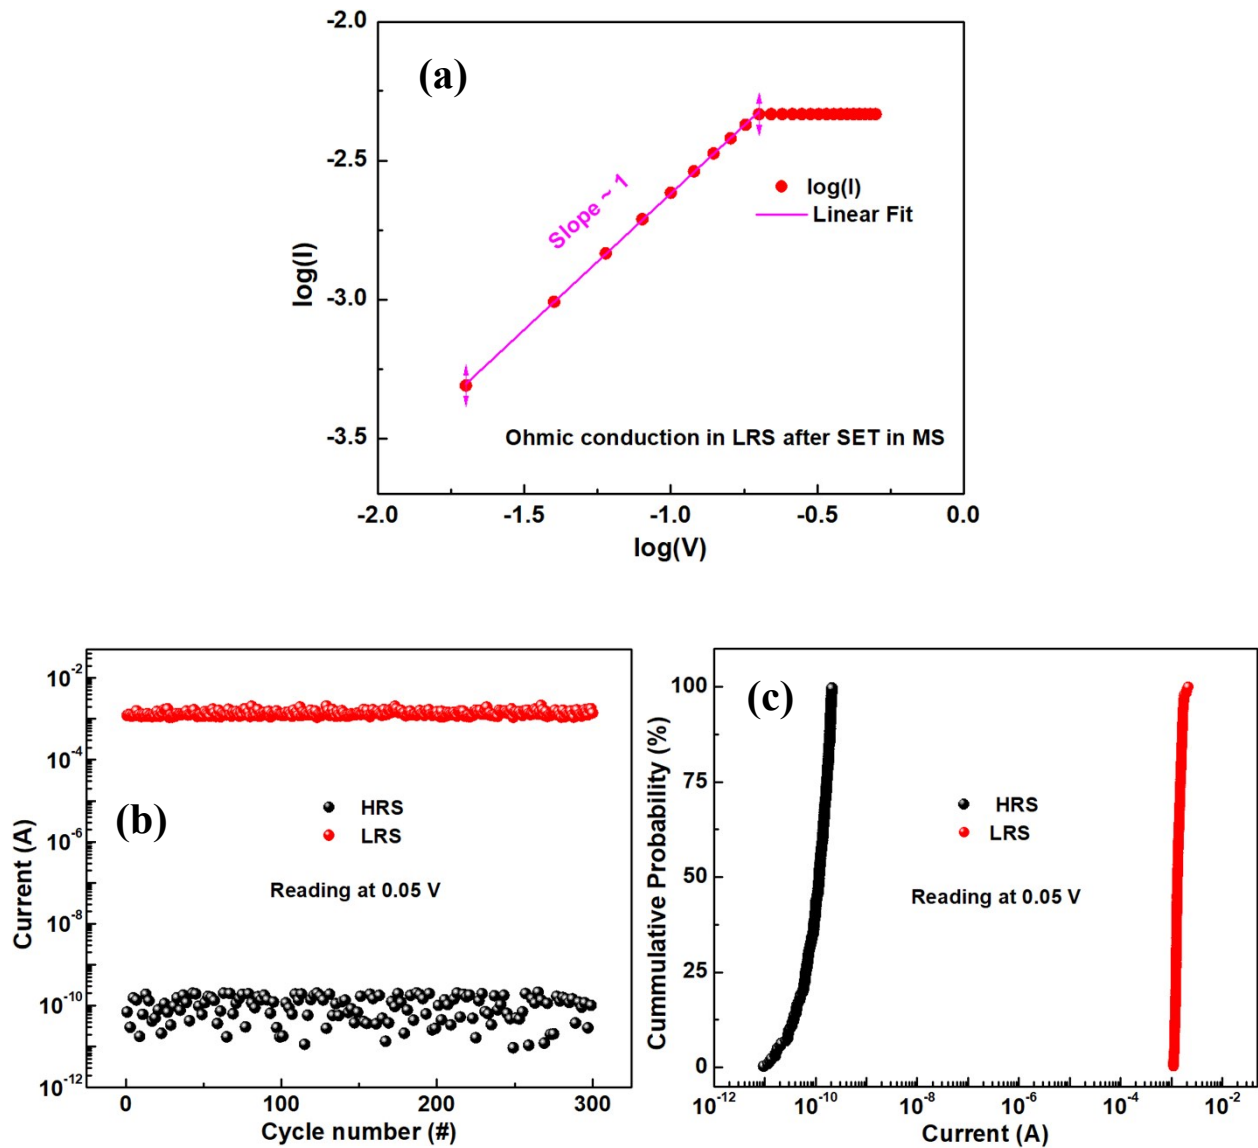

**Figure S9.** (a) The  $\log I$ - $\log V$  plot of the LRS in memory switching. (b) The DC endurance characteristics of the device. (b) The cumulative probability plot of HRS and LRS for 300 repeated cycles.
